# Supplementary material for: Performance Measures and Plasma Biomarker Levels in Patients with Multiple Sclerosis after 14 Days of Fampridine Treatment: An Explorative Study
Source: MDPI journal article supplement (doi:10.3390/ijms25031592), 2024-01-27
Supplement: s1 [file s1]

**Supplementary Figure.** *Inter-individual differences in cytokine levels between visit 1 and visit 2 in patients with multiple sclerosis, after 14 days of fampridine treatment.*

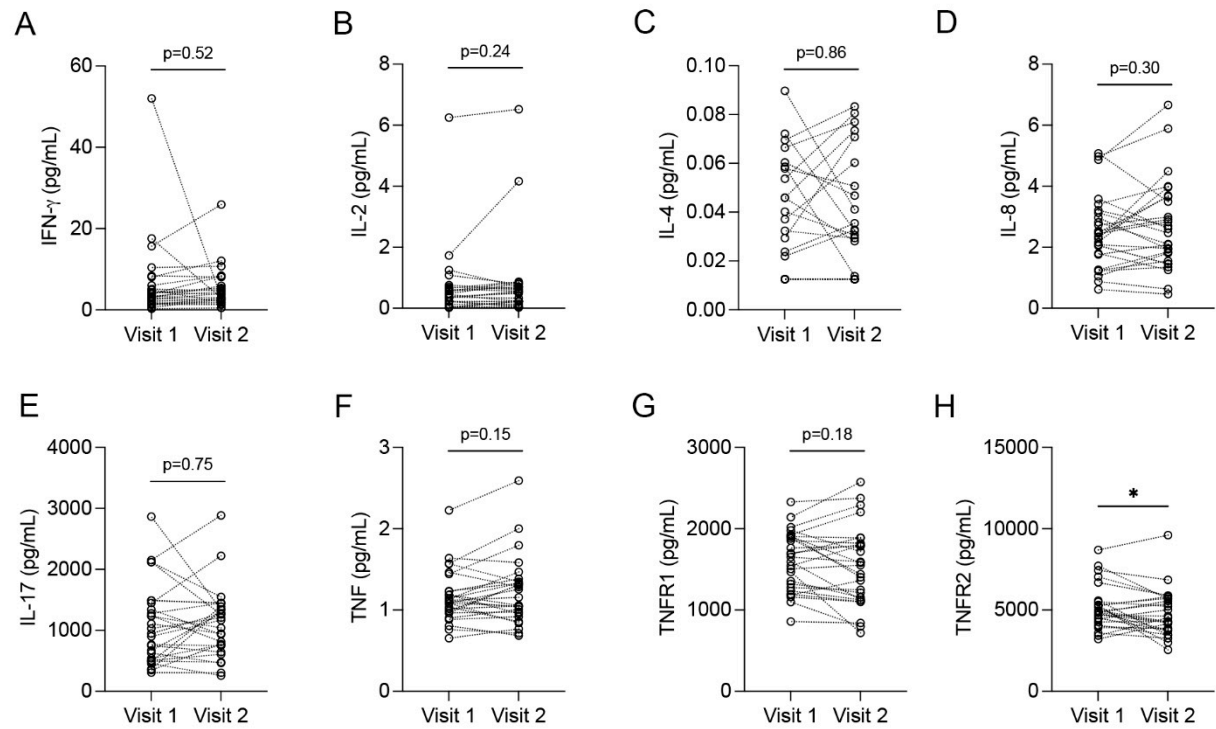

**Supplementary Figure S1.** Inter-individual differences in cytokine levels between visits. A: IFN- $\gamma$ ; B: IL-2; C: IL-4; D: IL-8; E: IL-17; F: TNF- $\alpha$ ; G: TNFR1; H: TNFR2. Abbreviations: IFN- $\gamma$ : Interferon gamma; IL: Interleukin; NFL: Neurofilament light; TNF: Tumor necrosis factor; R1: Receptor 1; R2: Receptor 2.
