# Supplementary material for: Performance Measures and Plasma Biomarker Levels in Patients with Multiple Sclerosis after 14 Days of Fampridine Treatment: An Explorative Study
Source: MDPI journal article supplement (doi:10.3390/ijms25031592), 2024-01-27
Supplement: s1 [file s1]

**Supplementary:** *Tables of missing data at the two visits and of correlations between change in biomarkers in plasma and change in performance measures in patients with multiple sclerosis, after 14 days of fampridine treatment*

| <b>Table S1a.</b> Overview of missing data at T <sub>0</sub> for the individual variables in patients with MS, n=27                                                                                                                                                                                                                                                                            |                 |                           |                           |
|------------------------------------------------------------------------------------------------------------------------------------------------------------------------------------------------------------------------------------------------------------------------------------------------------------------------------------------------------------------------------------------------|-----------------|---------------------------|---------------------------|
| <b>Measure</b>                                                                                                                                                                                                                                                                                                                                                                                 | <b>Variable</b> | <b>Reason for missing</b> | <b>Missing data n (%)</b> |
| <b>Biomarkers</b>                                                                                                                                                                                                                                                                                                                                                                              | IL-2            | Non-detectable            | 1 (3.7)                   |
|                                                                                                                                                                                                                                                                                                                                                                                                | IL-4            | Non-detectable            | 1 (3.7)                   |
|                                                                                                                                                                                                                                                                                                                                                                                                | IL-8            |                           | 0                         |
|                                                                                                                                                                                                                                                                                                                                                                                                | IL-17           | Non-detectable            | 5 (18.5)                  |
|                                                                                                                                                                                                                                                                                                                                                                                                | IFN- $\gamma$   |                           | 0                         |
|                                                                                                                                                                                                                                                                                                                                                                                                | TNF- $\alpha$   |                           | 0                         |
|                                                                                                                                                                                                                                                                                                                                                                                                | TNFR1           |                           | 0                         |
|                                                                                                                                                                                                                                                                                                                                                                                                | TNFR2           |                           | 0                         |
|                                                                                                                                                                                                                                                                                                                                                                                                | NFL             |                           | 0                         |
|                                                                                                                                                                                                                                                                                                                                                                                                | GFAP            |                           | 0                         |
| <b>Performance measures</b>                                                                                                                                                                                                                                                                                                                                                                    | T25FW           |                           | 0                         |
|                                                                                                                                                                                                                                                                                                                                                                                                | SSST            |                           | 0                         |
|                                                                                                                                                                                                                                                                                                                                                                                                | 2MWT            |                           | 0                         |
|                                                                                                                                                                                                                                                                                                                                                                                                | 9HPT            |                           | 0                         |
|                                                                                                                                                                                                                                                                                                                                                                                                | MSWS-12         | Technical problems        | 1 (3.7)                   |
| <b>Table S1b.</b> Overview of missing data at T <sub>1</sub> for the individual variables, n=27                                                                                                                                                                                                                                                                                                |                 |                           |                           |
| <b>Measure</b>                                                                                                                                                                                                                                                                                                                                                                                 | <b>Variable</b> | <b>Reason for missing</b> | <b>Missing data n (%)</b> |
| <b>Biomarkers</b>                                                                                                                                                                                                                                                                                                                                                                              | IL-2            | Non-detectable            | 5 (18.5)                  |
|                                                                                                                                                                                                                                                                                                                                                                                                | IL-4            | Non-detectable            | 1 (3.7)                   |
|                                                                                                                                                                                                                                                                                                                                                                                                | IL-8            |                           | 0                         |
|                                                                                                                                                                                                                                                                                                                                                                                                | IL-17           | Non-detectable            | 3 (11.1)                  |
|                                                                                                                                                                                                                                                                                                                                                                                                | IFN- $\gamma$   |                           | 0                         |
|                                                                                                                                                                                                                                                                                                                                                                                                | TNF- $\alpha$   |                           | 0                         |
|                                                                                                                                                                                                                                                                                                                                                                                                | TNFR1           | Non-detectable            | 1 (3.7)                   |
|                                                                                                                                                                                                                                                                                                                                                                                                | TNFR2           |                           | 0                         |
|                                                                                                                                                                                                                                                                                                                                                                                                | NFL             |                           | 0                         |
|                                                                                                                                                                                                                                                                                                                                                                                                | GFAP            |                           | 0                         |
| <b>Performance measures</b>                                                                                                                                                                                                                                                                                                                                                                    | T25FW           |                           | 0                         |
|                                                                                                                                                                                                                                                                                                                                                                                                | SSST            |                           | 0                         |
|                                                                                                                                                                                                                                                                                                                                                                                                | 2MWT            | Fatigue/tired             | 1 (3.7)                   |
|                                                                                                                                                                                                                                                                                                                                                                                                | 9HPT            |                           | 0                         |
|                                                                                                                                                                                                                                                                                                                                                                                                | MSWS-12         | Technical problems        | 2 (7.4)                   |
| 2MWT: Two-minute Walk Test; 9HPT: Nine Hole Peg Test; GFAP: glial fibrillary acidic protein; IFN: interferon gamma; IL: interleukin; IQR: interquartile range; MSWS-12: 12-Item Multiple Sclerosis Walking Scale; n: number; NFL: neurofilament light; R1: receptor 1; R: receptor 2; SD: standard deviation; SSST: Six Spot Step Test; T25FW: Timed 25-Foot Walk; TNF: tumor necrosis Factor. |                 |                           |                           |

**Table S2.** Correlations between change in biomarkers in plasma and change in performance measures in PwMS, after 14 days of fampridine treatment

| Correlation variables                                | Number (n) | Spearman's $\rho$ (rho) | Correlation<br>95% Bca    | p-value       |
|------------------------------------------------------|------------|-------------------------|---------------------------|---------------|
| <b>Correlations (change IFN-<math>\gamma</math>)</b> |            |                         |                           |               |
| Change MSWS-12                                       | 25         | -0.0543                 | [-0.4779 ; 0.3894]        | 0.7965        |
| Change 9HPT                                          | 27         | -0.1374                 | [-0.5441 ; 0.2953]        | 0.4944        |
| Change SSST                                          | 27         | -0.1789                 | [-0.5858 ; 0.2897]        | 0.3719        |
| Change T25FW                                         | 27         | -0.4559                 | [-0.7282 ; -0.0642]       | <b>0.0168</b> |
| Change 2MWT                                          | 26         | 0.2205                  | [-0.1651 ; 0.6321]        | 0.2790        |
| <b>Correlations (change IL-2)</b>                    |            |                         |                           |               |
| Change MSWS-12                                       | 19         | -0.0264                 | [-0.5205 ; 0.4785]        | 0.9145        |
| Change 9HPT                                          | 21         | -0.1364                 | [-0.6250 ; 0.4010]        | 0.5555        |
| Change SSST                                          | 21         | 0.5179                  | [0.0387 ; 0.8166]         | <b>0.0162</b> |
| Change T25FW                                         | 21         | 0.4646                  | <b>[-0.0490 ; 0.8115]</b> | <b>0.0339</b> |
| Change 2MWT                                          | 20         | -0.1354                 | [-0.6268 ; 0.4400]        | 0.5693        |
| <b>Correlations (change IL-4)</b>                    |            |                         |                           |               |
| Change MSWS-12                                       | 23         | 0.0343                  | [-0.3891 ; 0.4843]        | 0.8764        |
| Change 9HPT                                          | 25         | 0.0901                  | [-0.5056 ; 0.3719]        | 0.6685        |
| Change SSST                                          | 25         | -0.0740                 | [-0.4658 ; 0.3803]        | 0.7252        |
| Change T25FW                                         | 25         | -0.1705                 | [-0.5009 ; 0.2418]        | 0.4150        |
| Change 2MWT                                          | 24         | -0.1335                 | [-0.5066 ; 0.2535]        | 0.5340        |
| <b>Correlations (change IL-8)</b>                    |            |                         |                           |               |
| Change MSWS-12                                       | 25         | -0.1988                 | [-0.5759 ; 0.2672]        | 0.3407        |
| Change 9HPT                                          | 27         | -0.1838                 | [-0.5398 ; 0.2239]        | 0.3588        |
| Change SSST                                          | 27         | -0.4057                 | <b>[-0.6963 ; 0.0607]</b> | <b>0.0357</b> |
| Change T25FW                                         | 27         | -0.3979                 | [-0.6675 ; -0.0344]       | <b>0.0398</b> |
| Change 2MWT                                          | 26         | 0.1234                  | [-0.3202 ; 0.4491]        | 0.5481        |
| <b>Correlations (change IL-17)</b>                   |            |                         |                           |               |
| Change MSWS-12                                       | 19         | 0.4605                  | [-0.7713 ; -0.0037]       | <b>0.0473</b> |
| Change 9HPT                                          | 21         | 0.1429                  | [-0.3533 ; 0.6493]        | 0.5367        |
| Change SSST                                          | 21         | -0.5805                 | [-0.8018 ; -0.1264]       | <b>0.0058</b> |
| Change T25FW                                         | 21         | -0.3308                 | [-0.6960 ; 0.1848]        | 0.1429        |
| Change 2MWT                                          | 20         | 0.1925                  | [-0.4217 ; 0.6950]        | 0.4162        |
| <b>Correlations (change TNF-<math>\alpha</math>)</b> |            |                         |                           |               |
| Change MSWS-12                                       | 25         | 0.0975                  | [-0.2795 ; 0.4672]        | 0.6430        |
| Change 9HPT                                          | 27         | -0.2006                 | [-0.5633 ; 0.1649]        | 0.3158        |
| Change SSST                                          | 27         | -0.0171                 | [-0.4088 ; 0.4139]        | 0.9325        |
| Change T25FW                                         | 27         | -0.4159                 | <b>[-0.7173 ; 0.1056]</b> | <b>0.0309</b> |
| Change 2MWT                                          | 26         | 0.0195                  | [-0.3937 ; 0.4123]        | 0.9247        |
| <b>Correlations (change TNFR1)</b>                   |            |                         |                           |               |
| Change MSWS-12                                       | 24         | -0.1224                 | [-0.5477 ; 0.4085]        | 0.5688        |
| Change 9HPT                                          | 26         | 0.0865                  | [-0.3753 ; 0.5019]        | 0.6744        |
| Change SSST                                          | 26         | 0.0947                  | [-0.3534 ; 0.5114]        | 0.6453        |
| Change T25FW                                         | 26         | -0.0759                 | [-0.4459 ; 0.3354]        | 0.7124        |
| Change 2MWT                                          | 25         | -0.1323                 | [-0.5160 ; 0.2549]        | 0.5284        |
| <b>Correlations (change TNFR2)</b>                   |            |                         |                           |               |
| Change MSWS-12                                       | 25         | -0.0516                 | [-0.4760 ; 0.4194]        | 0.8064        |
| Change 9HPT                                          | 27         | 0.2684                  | [-0.2145 ; 0.6447]        | 0.1759        |
| Change SSST                                          | 27         | 0.0018                  | [-0.4420 ; 0.4480]        | 0.9928        |
| Change T25FW                                         | 27         | -0.1857                 | [-0.5624 ; 0.2622]        | 0.3538        |
| Change 2MWT                                          | 26         | 0.1583                  | [-0.2853 ; 0.5429]        | 0.4399        |
| <b>Correlations (change NFL)</b>                     |            |                         |                           |               |

|                                                                                                                                                                                                                                                                                                                                                                                                                                                                                                                                                                                                                                                                   |    |         |                           |               |
|-------------------------------------------------------------------------------------------------------------------------------------------------------------------------------------------------------------------------------------------------------------------------------------------------------------------------------------------------------------------------------------------------------------------------------------------------------------------------------------------------------------------------------------------------------------------------------------------------------------------------------------------------------------------|----|---------|---------------------------|---------------|
| Change MSWS-12                                                                                                                                                                                                                                                                                                                                                                                                                                                                                                                                                                                                                                                    | 25 | -0.3271 | [-0.6865 ; 0.2016]        | 0.1105        |
| Change 9HPT                                                                                                                                                                                                                                                                                                                                                                                                                                                                                                                                                                                                                                                       | 27 | 0.2155  | [-0.2330 ; 0.5988]        | 0.2803        |
| Change SSST                                                                                                                                                                                                                                                                                                                                                                                                                                                                                                                                                                                                                                                       | 27 | -0.2421 | [-0.6057 ; 0.1864]        | 0.2237        |
| Change T25FW                                                                                                                                                                                                                                                                                                                                                                                                                                                                                                                                                                                                                                                      | 27 | -0.4086 | <b>[-0.7255 ; 0.0228]</b> | <b>0.0343</b> |
| Change 2MWT                                                                                                                                                                                                                                                                                                                                                                                                                                                                                                                                                                                                                                                       | 26 | 0.2581  | [-0.1419 ; 0.5907]        | 0.2030        |
| <b>Correlations (change GFAP)</b>                                                                                                                                                                                                                                                                                                                                                                                                                                                                                                                                                                                                                                 |    |         |                           |               |
| Change MSWS-12                                                                                                                                                                                                                                                                                                                                                                                                                                                                                                                                                                                                                                                    | 25 | -0.3506 | [-0.6465 ; 0.1452]        | 0.0857        |
| Change 9HPT                                                                                                                                                                                                                                                                                                                                                                                                                                                                                                                                                                                                                                                       | 27 | 0.1209  | [-0.3482 ; 0.5051]        | 0.5480        |
| Change SSST                                                                                                                                                                                                                                                                                                                                                                                                                                                                                                                                                                                                                                                       | 27 | -0.1526 | [-0.5545 ; 0.3037]        | 0.4472        |
| Change T25FW                                                                                                                                                                                                                                                                                                                                                                                                                                                                                                                                                                                                                                                      | 27 | -0.2098 | [-0.5571 ; 0.2183]        | 0.2936        |
| Change 2MWT                                                                                                                                                                                                                                                                                                                                                                                                                                                                                                                                                                                                                                                       | 26 | 0.2602  | [-0.1474 ; 0.5614]        | 0.1993        |
| Correlations are expressed through Spearman's $\rho$ (rho) and 95% BCa followed by a $p$ -value. The 95% Bca written in red include 0. Abbreviations: 2MWT: Two-minute Walk Test; 9HPT: Nine Hole Peg Test; 95% BCa: bias-corrected, accelerated bootstrap confidence interval; GFAP: glial fibrillary acidic protein; IFN: interferon gamma; IL: interleukin; IQR: interquartile range; MSWS-12: 12-Item Multiple Sclerosis Walking Scale; n: number; NFL: neurofilament light; PwMS: patients with multiple sclerosis; R1: receptor 1; R2: receptor 2; SD: standard deviation; SSST: Six Spot Step Test; T25FW: Timed 25-Foot Walk; TNF: tumor necrosis Factor. |    |         |                           |               |
